# Supplementary material
Source: Springer Nature journal article supplement (https://www.springermedizin.de/resource/supplementary/12888_2009_672_MOESM1_ESM.pdf/9478118)
Supplement: MOESM1 [file 9478118]

N=373

N=314  
Program group

N=59  
Control group

N=278  
Visit 1, 2 and 3

N=36  
Visit 1 and 2 only

N=59  
Visit 1 and 2.  
No Visit 3 was planned for the  
control group
